# Supplementary material for: Natural Flexible and Responsive 2D Photonic Materials with Micro-Sandwich Structure
Source: MDPI journal article supplement (doi:10.3390/photonics10030245), 2023-02-23
Supplement: s1 [file s1]

Archive with 1 entries (1 files):
- photonics-2092896-supplementary.pdf
